# Supplementary material for: In Escherichia coli Ammonia Inhibits Cytochrome bo3 But Activates Cytochrome bd-I
Source: PubMed Central journal article supplement (PMC7824442; doi:10.3390/antiox10010013), 2020-12-25
Supplement: antioxidants-10-00013-s001.pdf [file antioxidants-10-00013-s001.pdf]

## Supplementary Materials for

Article

**In *Escherichia coli* Ammonia Inhibits Cytochrome *bo*<sub>3</sub> but Activates Cytochrome *bd*-I**

Elena Forte, Sergey A. Siletsky and Vitaliy B. Borisov

## Supplementary Figures

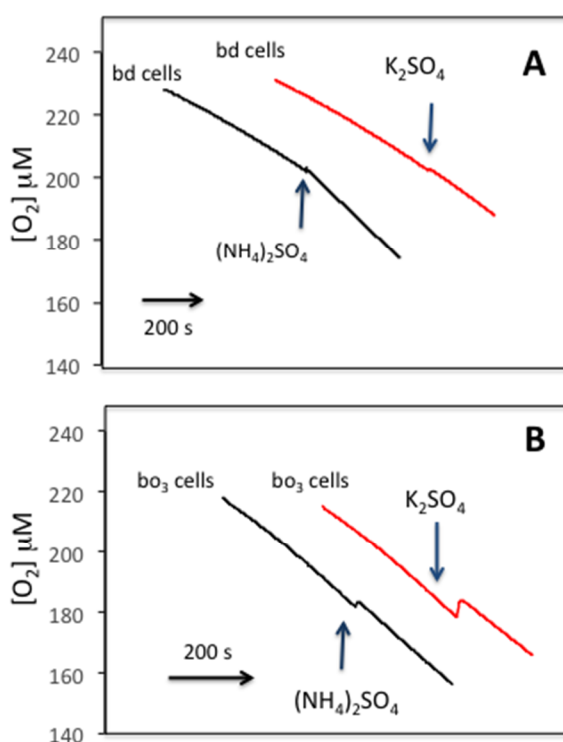

**Supplementary Figure S1.** O<sub>2</sub> consumption traces showing the effect of (NH<sub>4</sub>)<sub>2</sub>SO<sub>4</sub> on the respiration of *E. coli* in respiratory mutants at pH 8.3. **A)** The addition of 13 mM (NH<sub>4</sub>)<sub>2</sub>SO<sub>4</sub>, but not 13 mM K<sub>2</sub>SO<sub>4</sub>, increases O<sub>2</sub> consumption by cell suspensions of the mutant strain expressing cytochrome *bd*-I as the only terminal oxidase (400 μl cells with OD<sub>600</sub> = 2.3). **B)** Neither 13 mM (NH<sub>4</sub>)<sub>2</sub>SO<sub>4</sub> nor 13 mM K<sub>2</sub>SO<sub>4</sub> affects respiration in the mutant strain expressing cytochrome *bo*<sub>3</sub> as the sole oxidase (300 μl cells with OD<sub>600</sub> = 2.15).

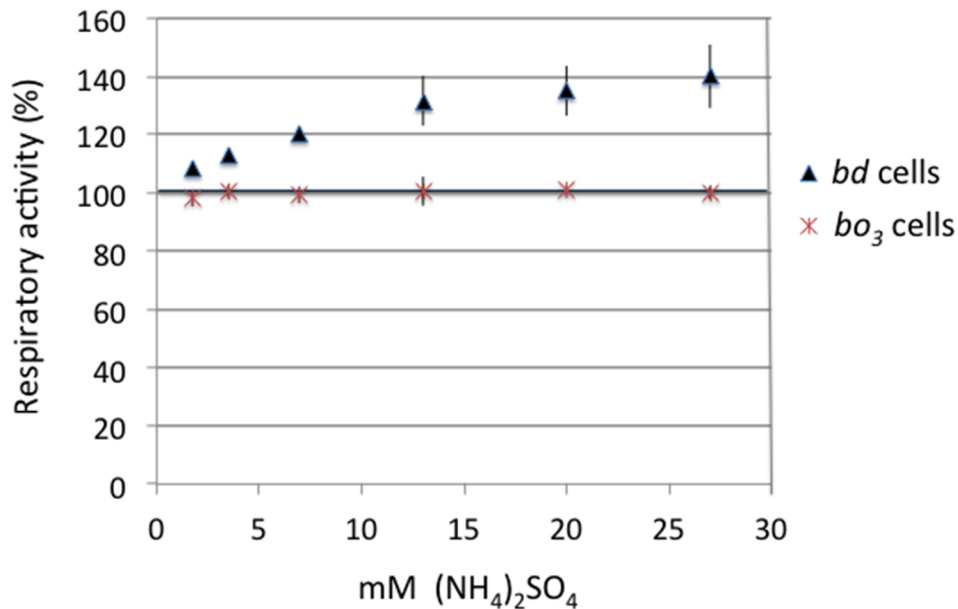

**Supplementary Figure S2.** Effect of (NH<sub>4</sub>)<sub>2</sub>SO<sub>4</sub> on the respiration of *E. coli* in respiratory mutants. The respiratory activity measured increased after the addition to mutant *E. coli* cells of (NH<sub>4</sub>)<sub>2</sub>SO<sub>4</sub> at increasing the ligand concentrations ranging from 1.75 mM to 27 mM. Data (mean ± standard deviation, *n* = 3) refer to the control activity measured before the addition of (NH<sub>4</sub>)<sub>2</sub>SO<sub>4</sub> (taken as 100%). Addition of K<sub>2</sub>SO<sub>4</sub> in the same range of concentrations does not affect the respiratory activity of both mutants.

### Supplementary Methods

#### *Bacterial strains and growth conditions*

The *E. coli* respiratory mutant strains used, derived from the K-12 derivative MG1655 (RKP5416), were TBE025 (MG1655 ΔcydB nuoB appB::kan) and TBE037 (MG1655 ΔappB nuoB cyoB::kan), respectively expressing cytochrome *bo*<sub>3</sub>, and *bd*-I as the only terminal oxidase (mutants kindly given by Alex Ter Beek and Joost Teixeira de Mattos, University of Amsterdam).

*E. coli* cells were grown in 50 mL-Falcon tubes in 5 mL Luria Bertani (LB) medium supplemented with 30 μg/ mL kanamycin at 37 °C and 200 rpm.

#### *Assay conditions*

The respirometric assays were performed at 25 °C in 100 mM Tris-phosphate (pH 8.3).
